# Supplementary material for: Automated design of flexible linkers
Source: Royal Society of Chemistry journal article supplement (doi:10.1039/c5dt03511b), 2015-12-21

Supplementary Material: Accepted Fragments for 40% False Discovery Rate

| Rank | Mann Whitney U Test p-value | Behavior Descriptor                                                                  |
|------|-----------------------------|--------------------------------------------------------------------------------------|
| 1    | 0.029129495                 | 3-Strain at buckling * Stiffness at zero strain<br>(minimize, Linker in Compression) |

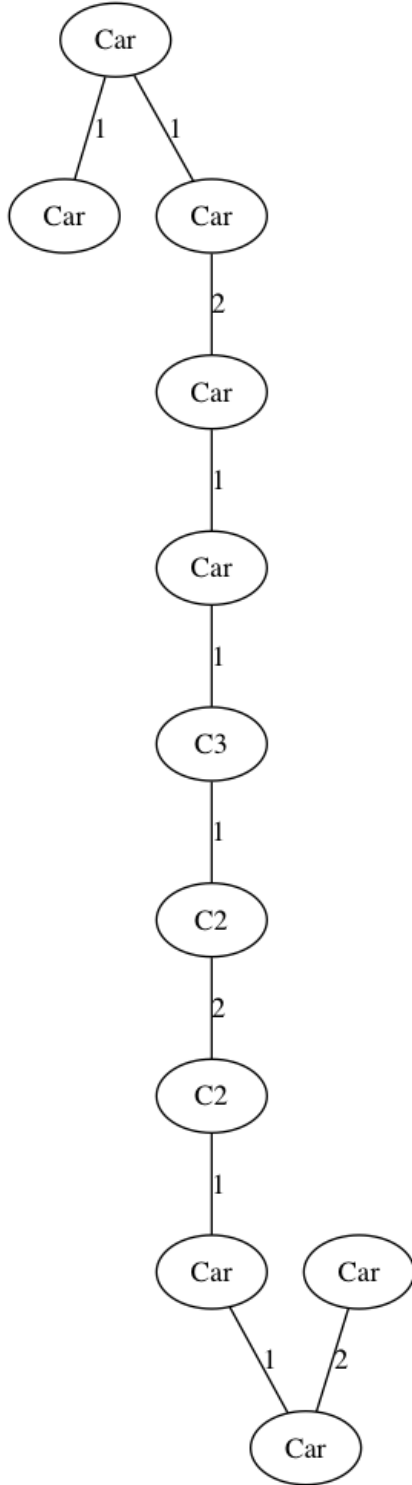

| Rank | Mann Whitney U Test p-value | Behavior Descriptor                                                                  |
|------|-----------------------------|--------------------------------------------------------------------------------------|
| 2    | 0.032446548                 | 12-Nonlinearity in the stiffness around zero strain<br>(minimize, Linker in Tension) |

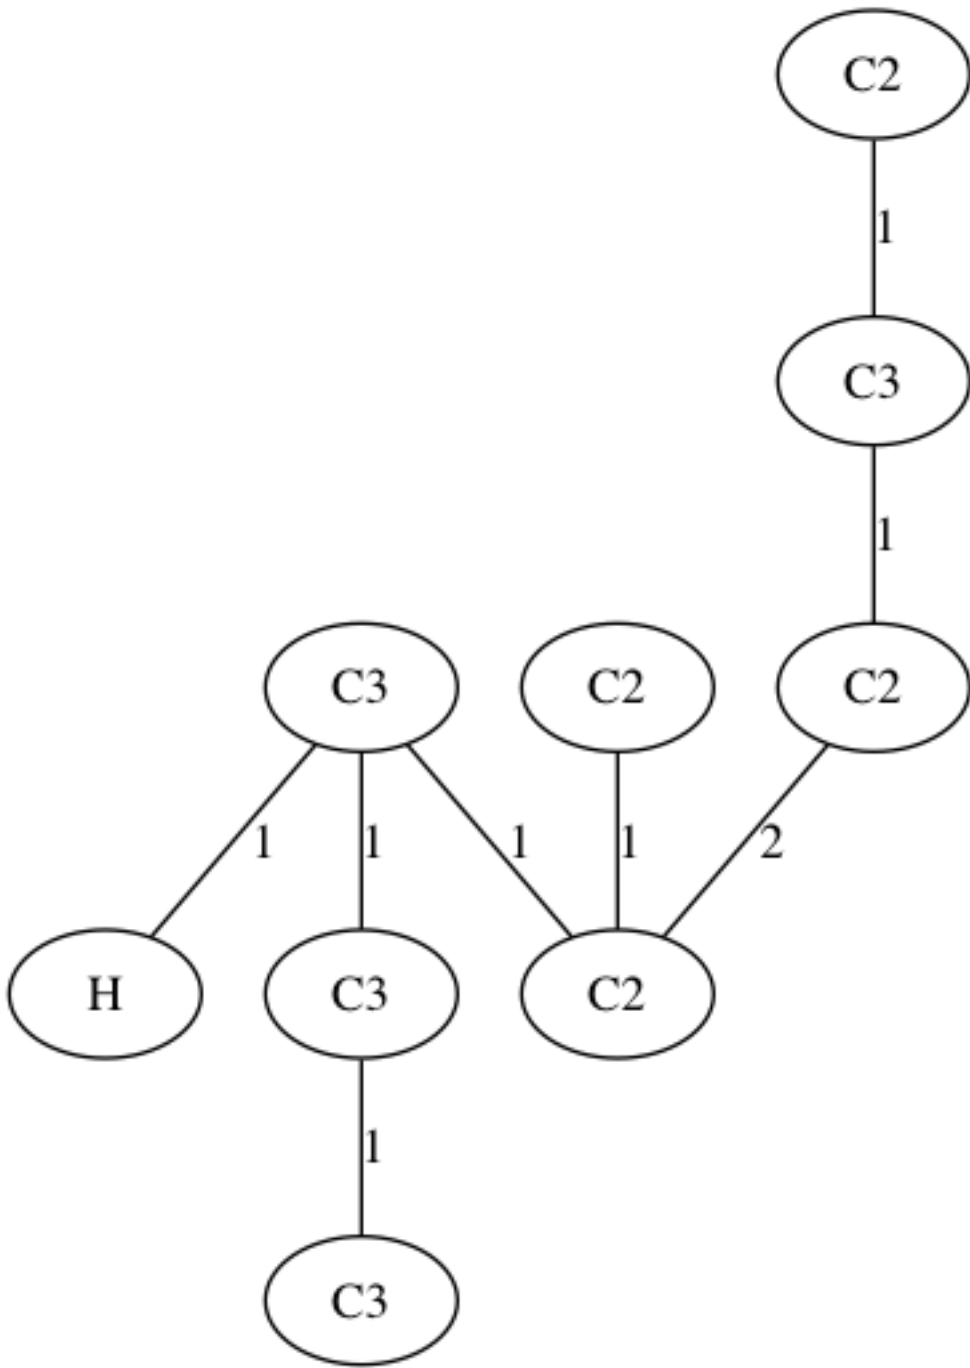

| Rank | Mann Whitney U Test p-value | Behavior Descriptor                                                                  |
|------|-----------------------------|--------------------------------------------------------------------------------------|
| 3    | 0.032446548                 | 12-Nonlinearity in the stiffness around zero strain<br>(minimize, Linker in Tension) |

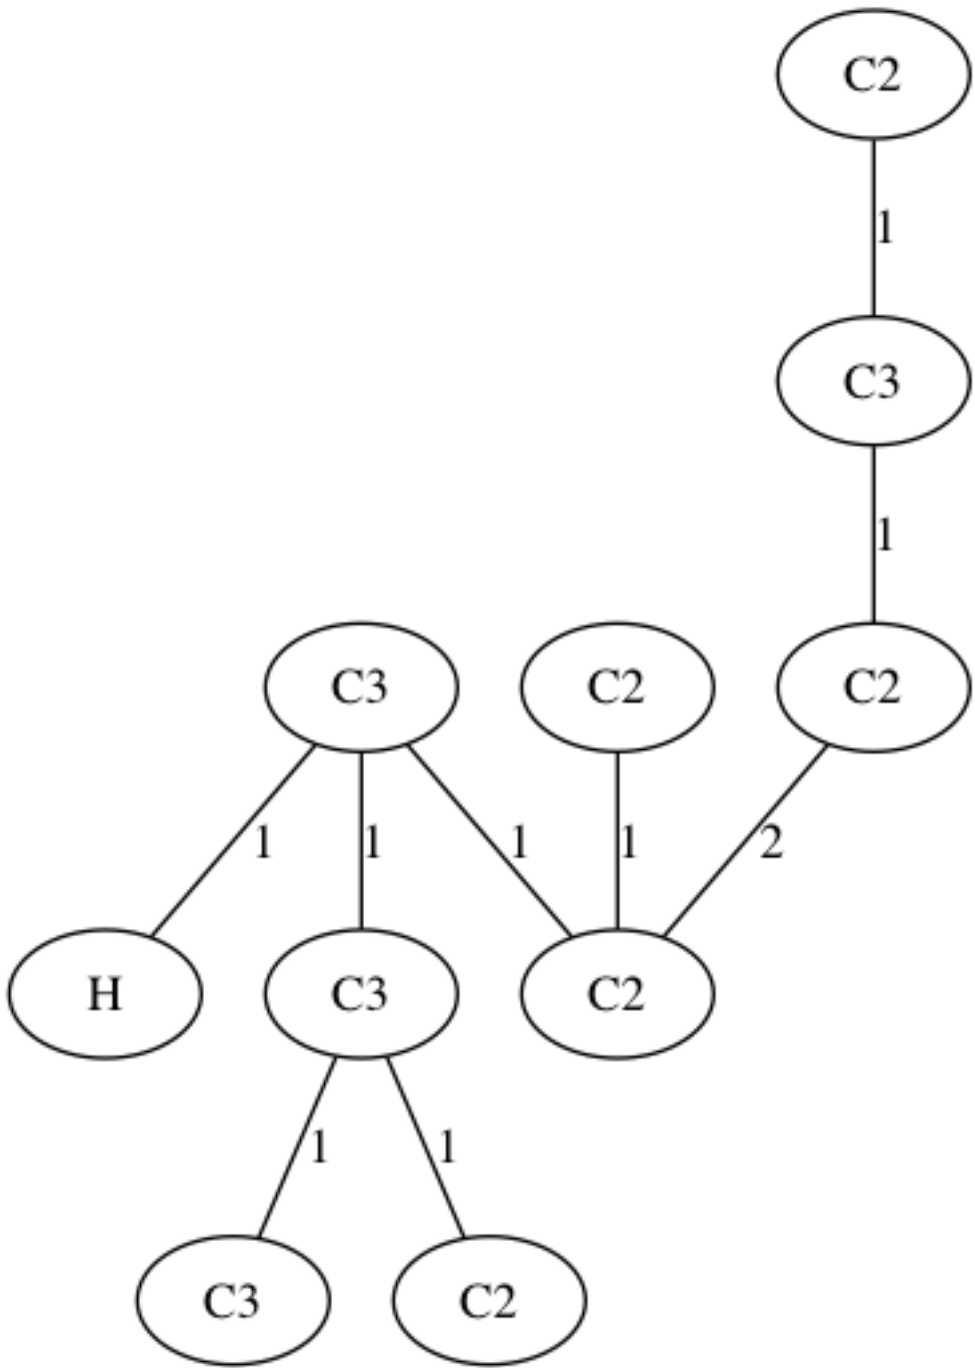

| Rank | Mann Whitney U Test p-value | Behavior Descriptor                                                                  |
|------|-----------------------------|--------------------------------------------------------------------------------------|
| 4    | 0.032446548                 | 12-Nonlinearity in the stiffness around zero strain<br>(minimize, Linker in Tension) |

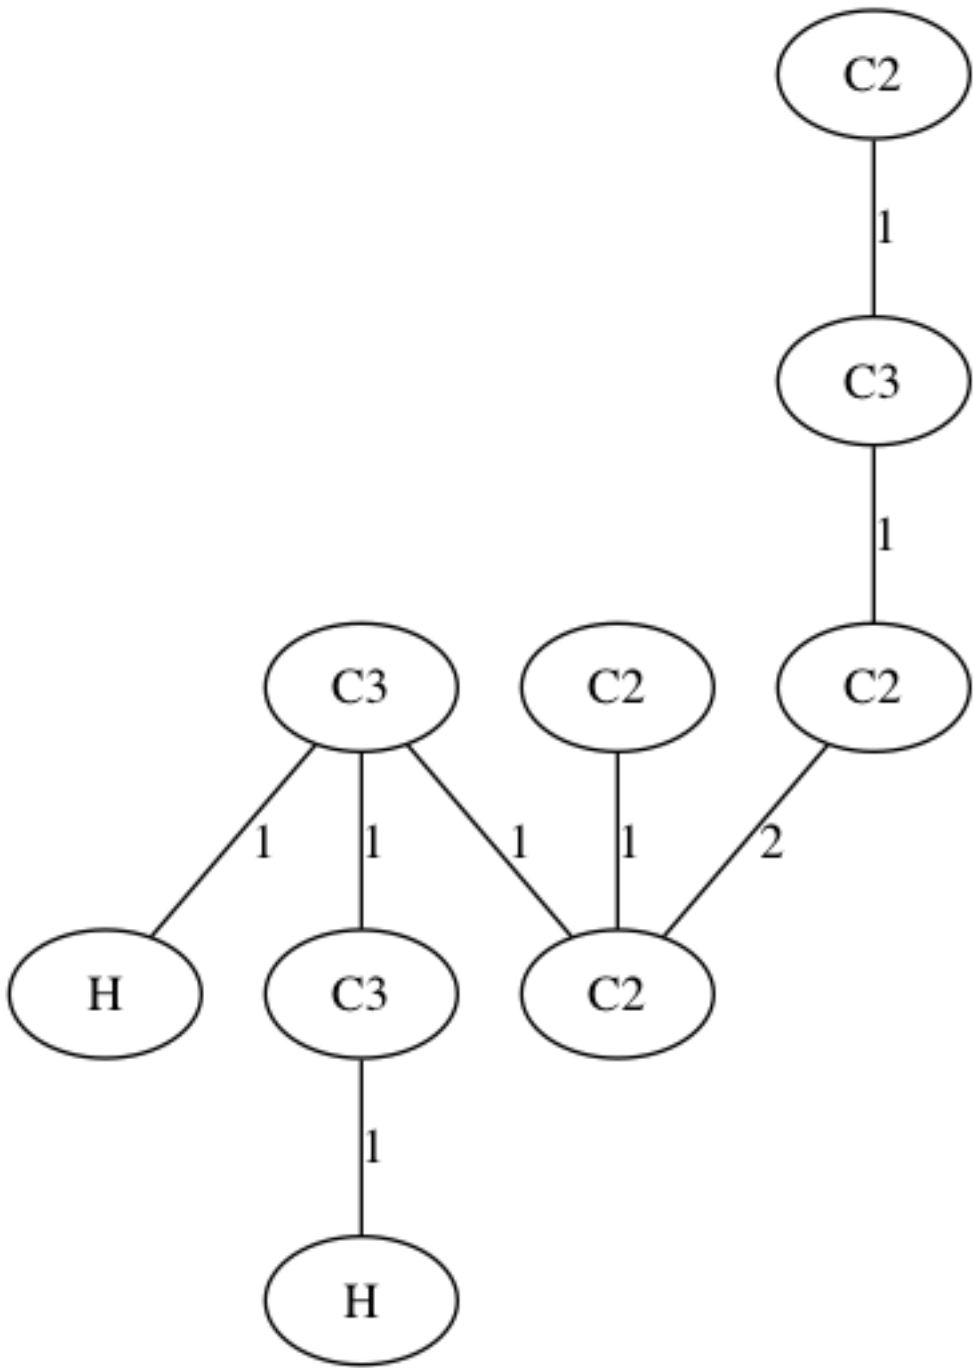

| Rank | Mann Whitney U Test p-value | Behavior Descriptor                                                                  |
|------|-----------------------------|--------------------------------------------------------------------------------------|
| 5    | 0.032446548                 | 12-Nonlinearity in the stiffness around zero strain<br>(minimize, Linker in Tension) |

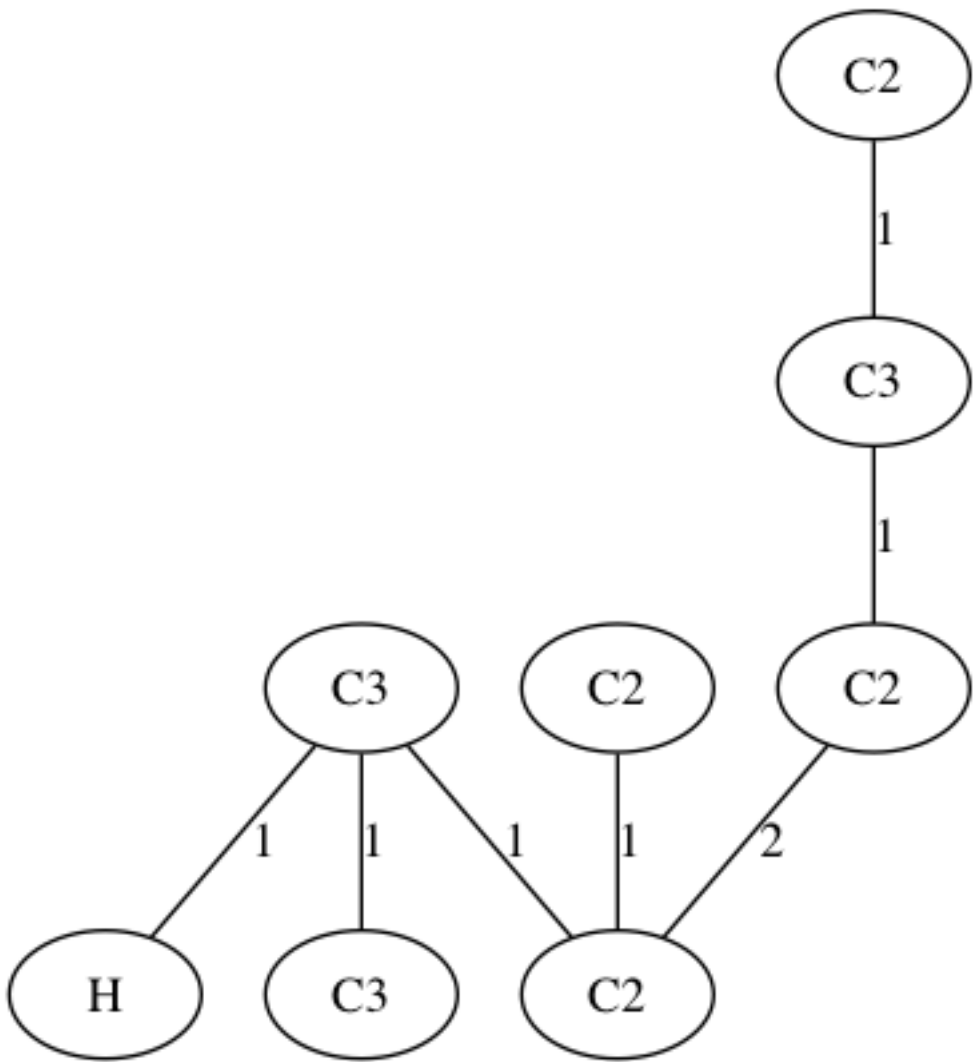

| Rank | Mann Whitney U Test p-value | Behavior Descriptor                                                                  |
|------|-----------------------------|--------------------------------------------------------------------------------------|
| 6    | 0.032446548                 | 12-Nonlinearity in the stiffness around zero strain<br>(minimize, Linker in Tension) |

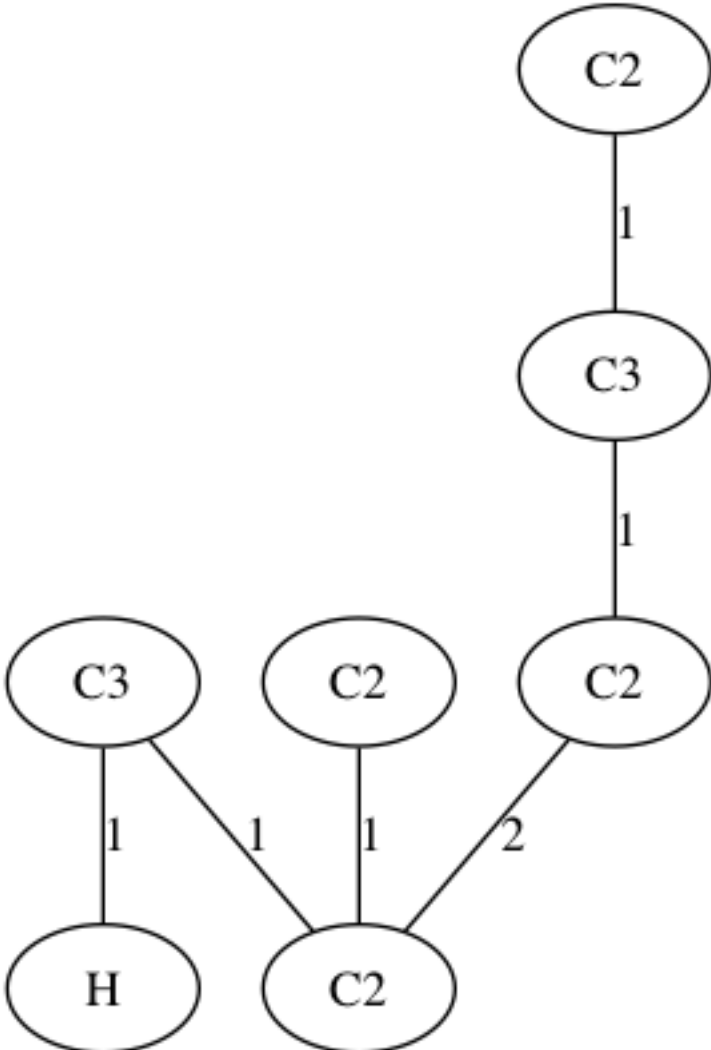

| Rank | Mann Whitney U Test p-value | Behavior Descriptor                                                                     |
|------|-----------------------------|-----------------------------------------------------------------------------------------|
| 7    | 0.03259291                  | 11-Stiffness after buckling / Stiffness at zero strain<br>(minimize, Linker in Tension) |

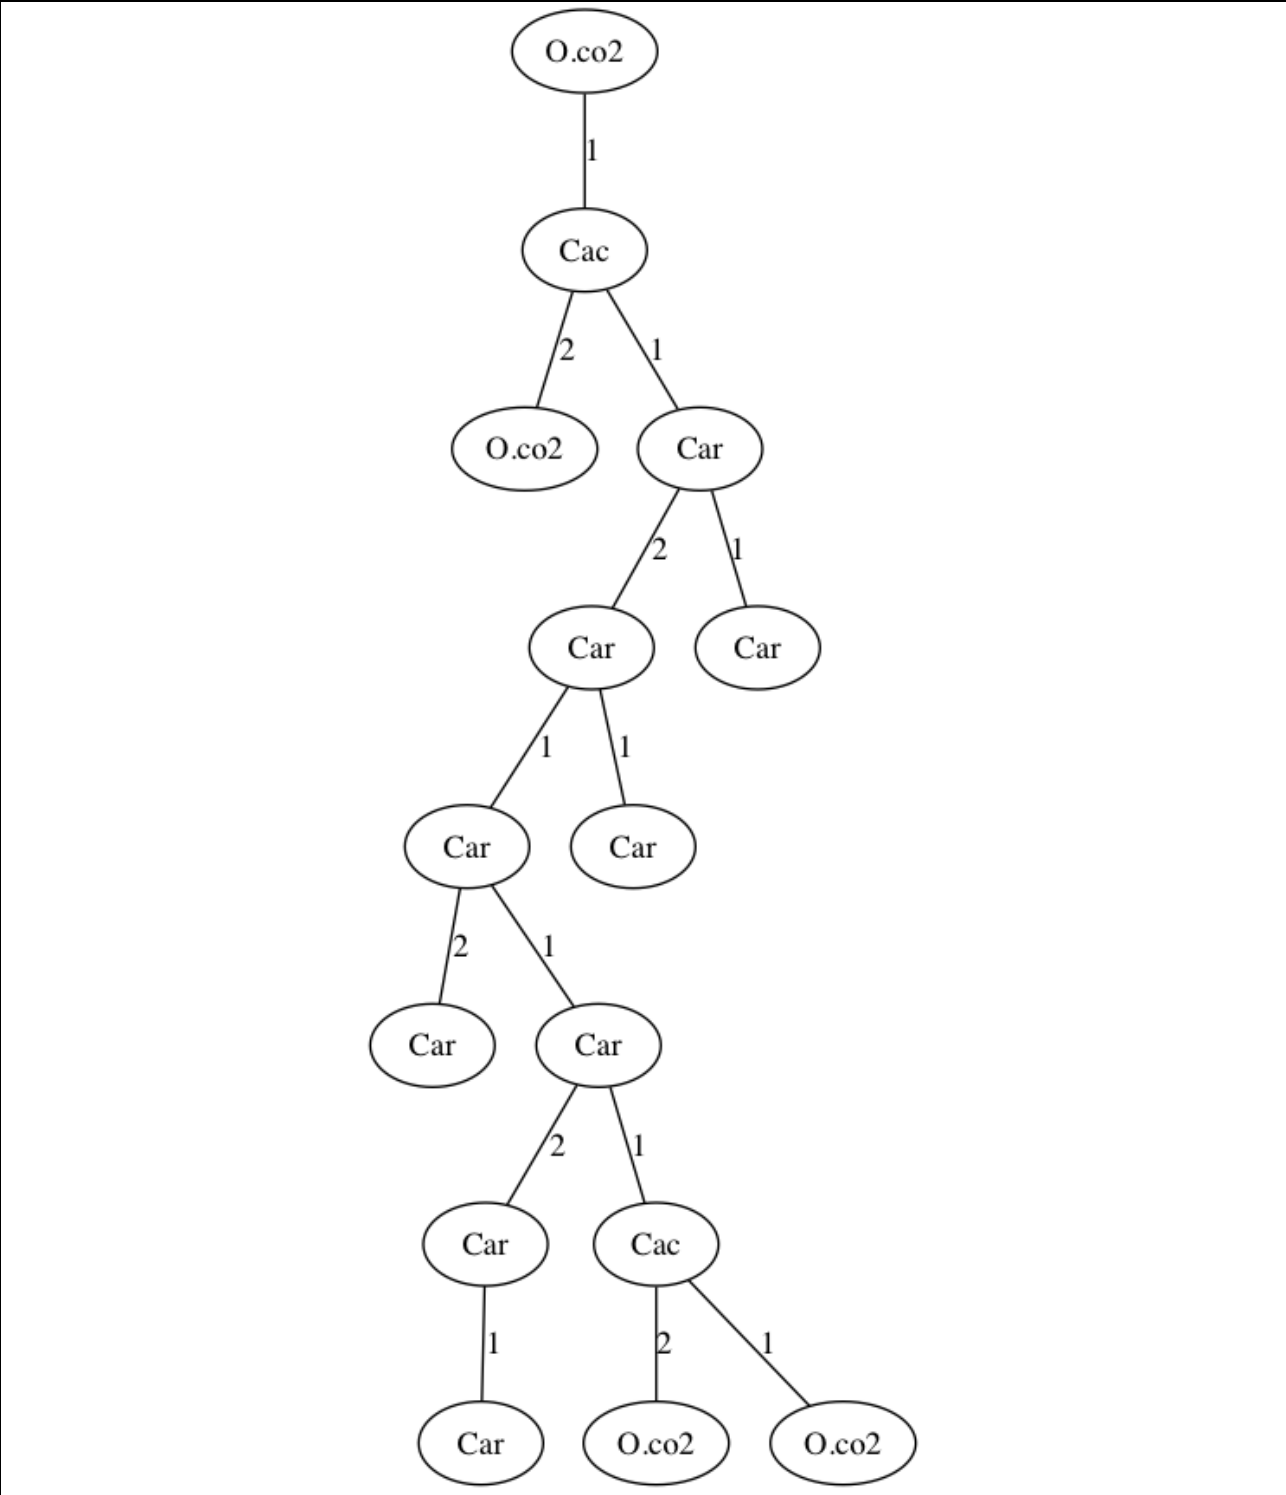



| Rank | Mann Whitney U Test p-value | Behavior Descriptor                                                                                |
|------|-----------------------------|----------------------------------------------------------------------------------------------------|
| 8    | 0.052043615                 | 2-Step height of piecewise linear fit of Force-Displacement Curve<br>(maximize, Linker in Tension) |

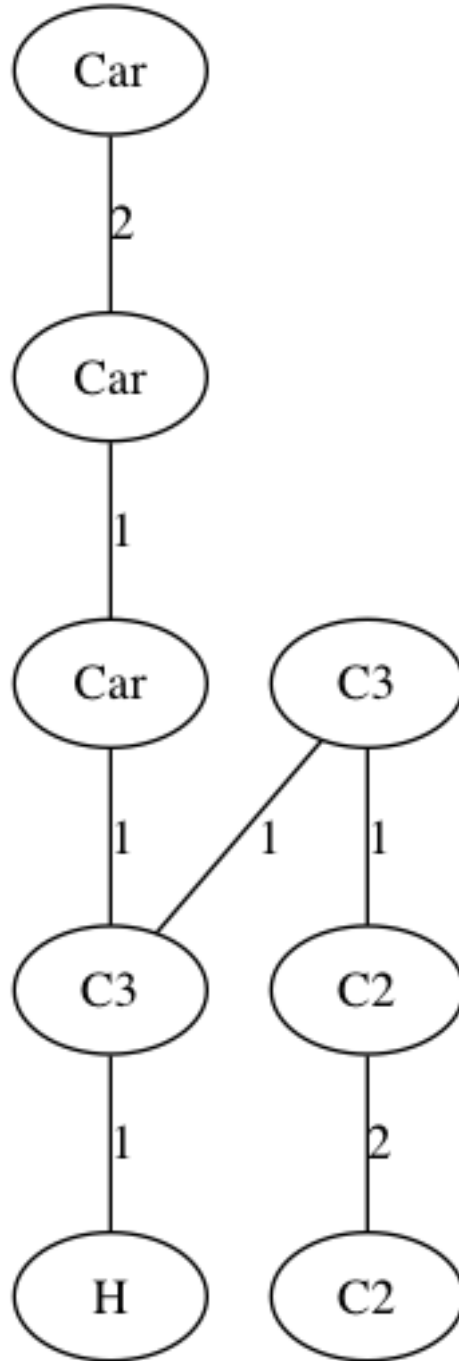

| Rank | Mann Whitney U Test p-value | Behavior Descriptor                                                                                |
|------|-----------------------------|----------------------------------------------------------------------------------------------------|
| 9    | 0.055646263                 | 2-Step height of piecewise linear fit of Force-Displacement Curve<br>(maximize, Linker in Tension) |

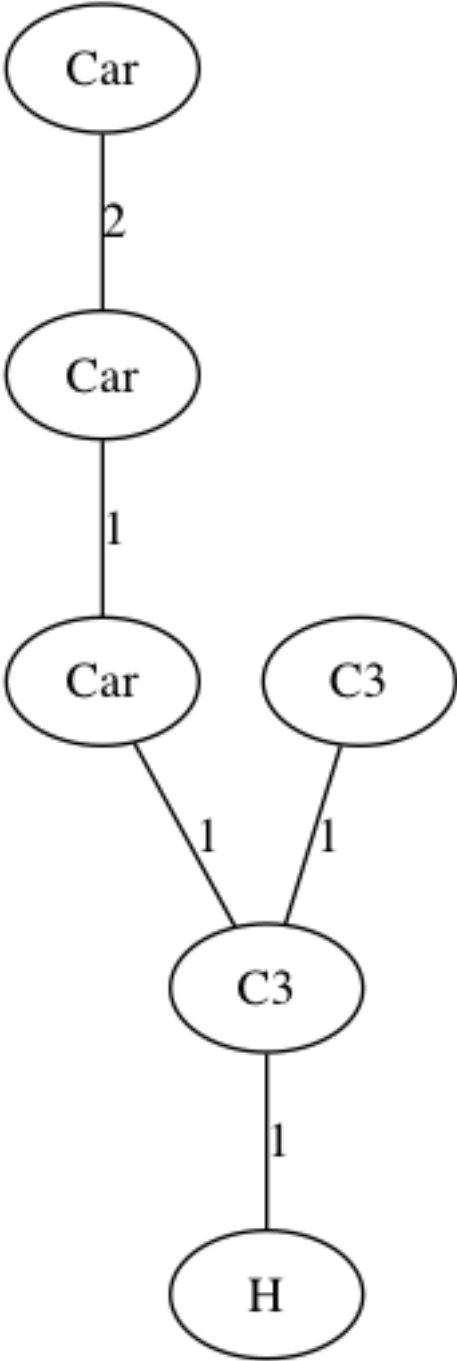

| Rank | Mann Whitney U Test p-value | Behavior Descriptor                                                                        |
|------|-----------------------------|--------------------------------------------------------------------------------------------|
| 10   | 0.070064455                 | 6-Stiffness after buckling / Stiffness at zero strain<br>(minimize, Linker in Compression) |

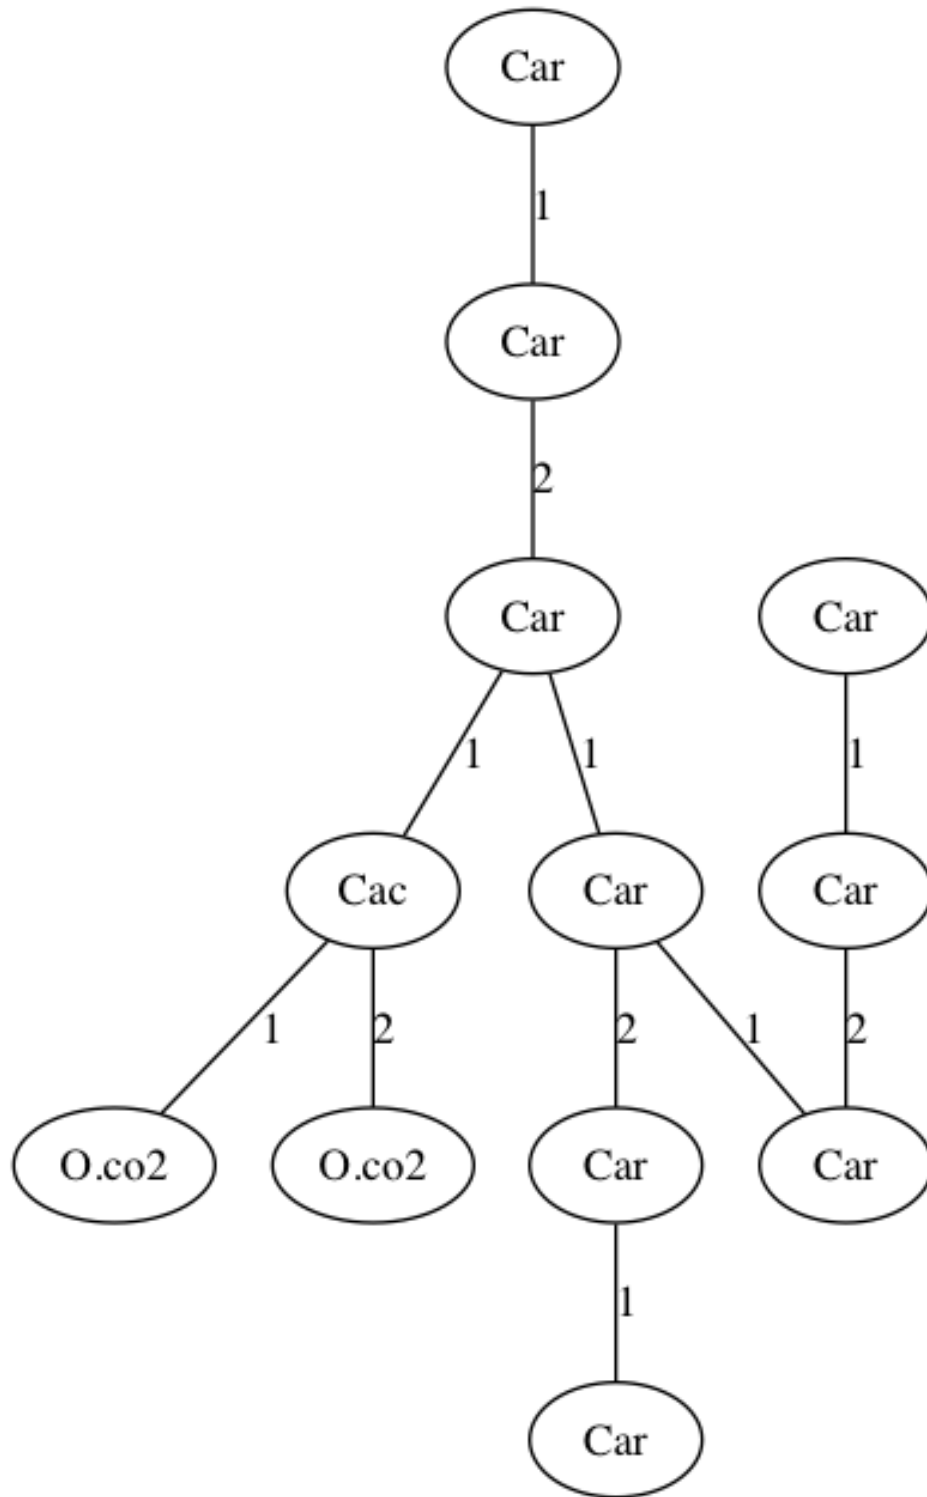

| Rank | Mann Whitney U Test p-value | Behavior Descriptor                                                                        |
|------|-----------------------------|--------------------------------------------------------------------------------------------|
| 11   | 0.070064455                 | 6-Stiffness after buckling / Stiffness at zero strain<br>(minimize, Linker in Compression) |

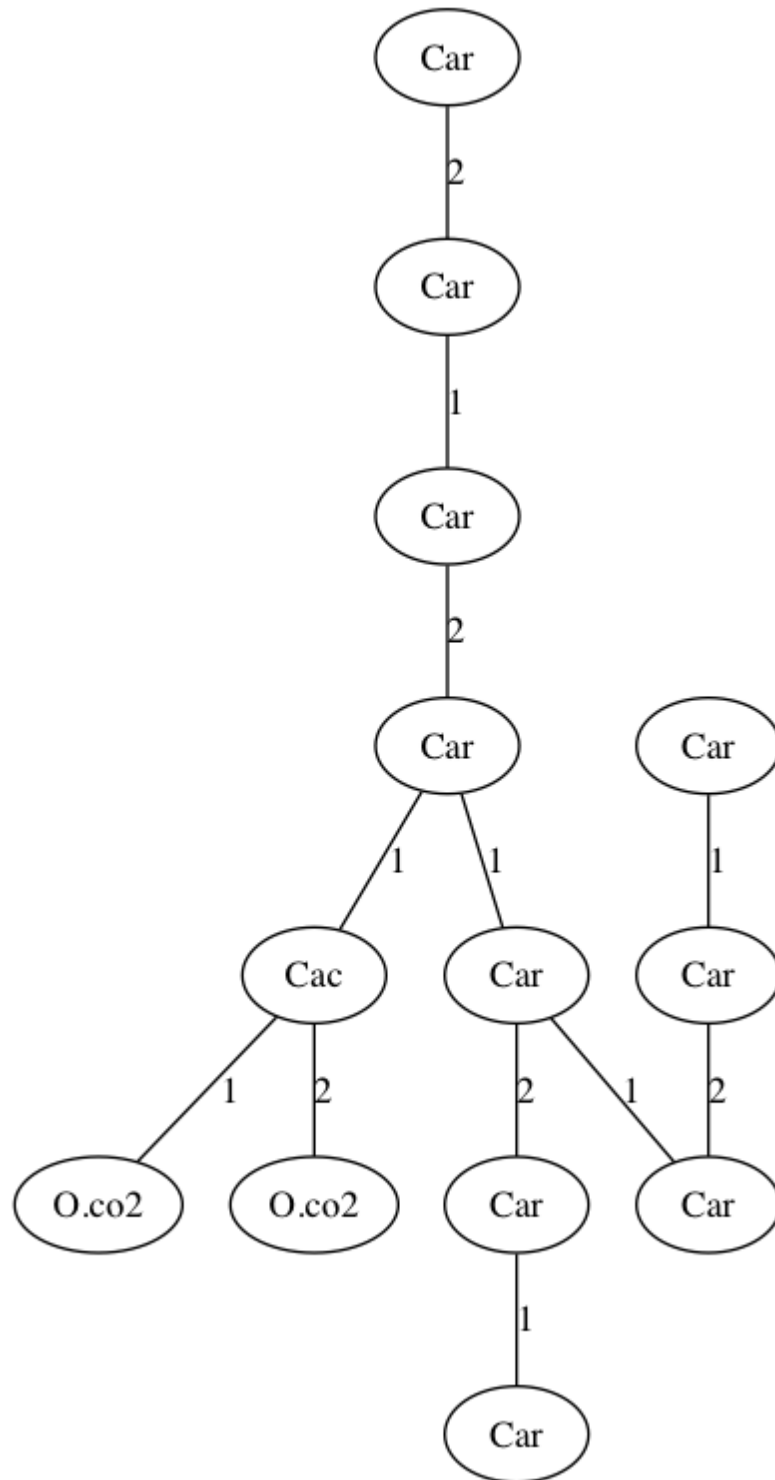

| Rank | Mann Whitney U Test p-value | Behavior Descriptor                                                                        |
|------|-----------------------------|--------------------------------------------------------------------------------------------|
| 12   | 0.070064455                 | 6-Stiffness after buckling / Stiffness at zero strain<br>(minimize, Linker in Compression) |

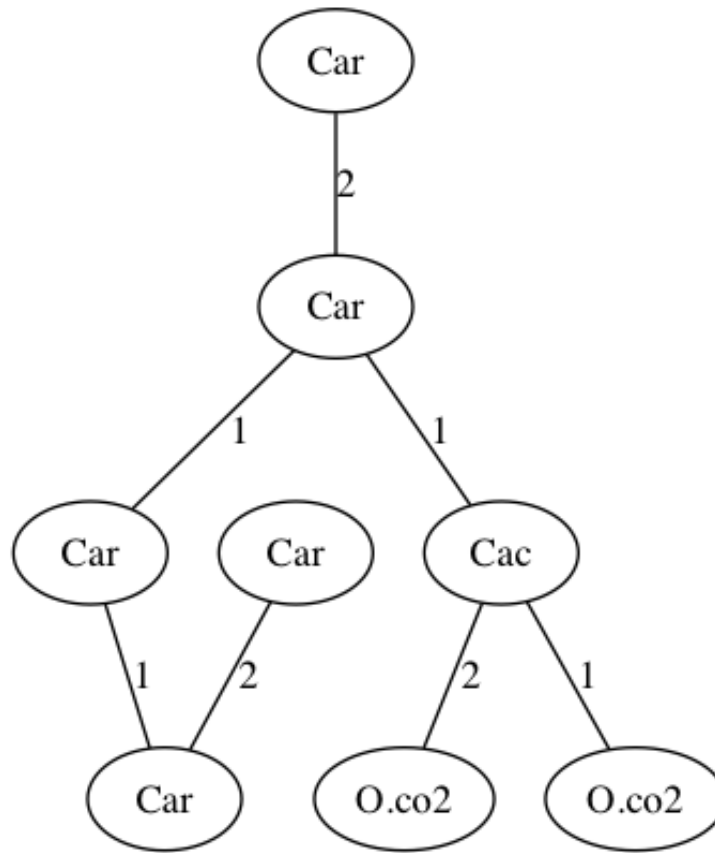

| Rank | Mann Whitney U Test p-value | Behavior Descriptor                                                                                |
|------|-----------------------------|----------------------------------------------------------------------------------------------------|
| 13   | 0.077347668                 | 2-Step height of piecewise linear fit of Force-Displacement Curve<br>(maximize, Linker in Tension) |

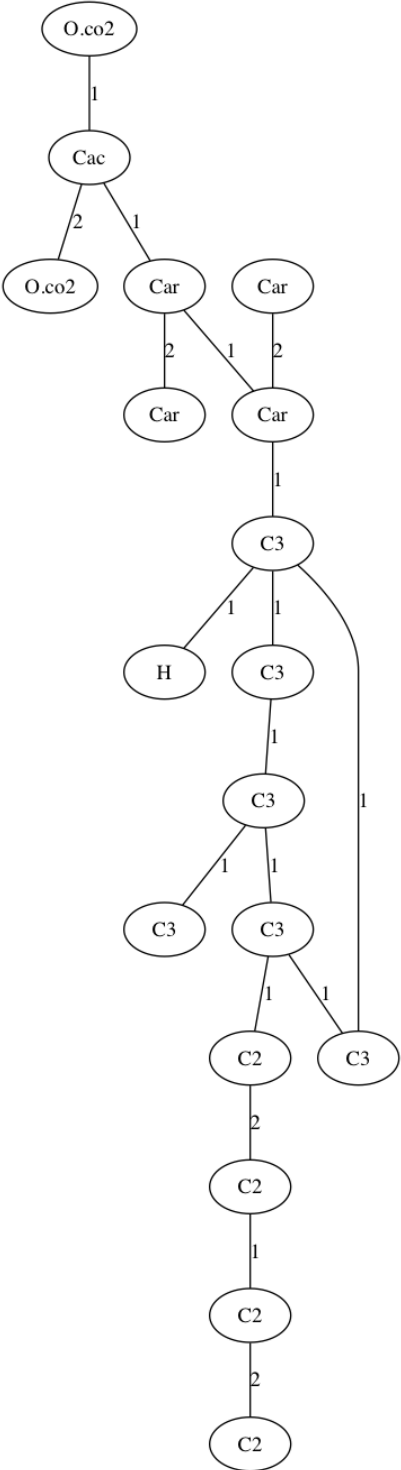

| Rank | Mann Whitney U Test p-value | Behavior Descriptor                                                                     |
|------|-----------------------------|-----------------------------------------------------------------------------------------|
| 14   | 0.08699986                  | 7-Nonlinearity in the stiffness around zero strain<br>(minimize, Linker in Compression) |

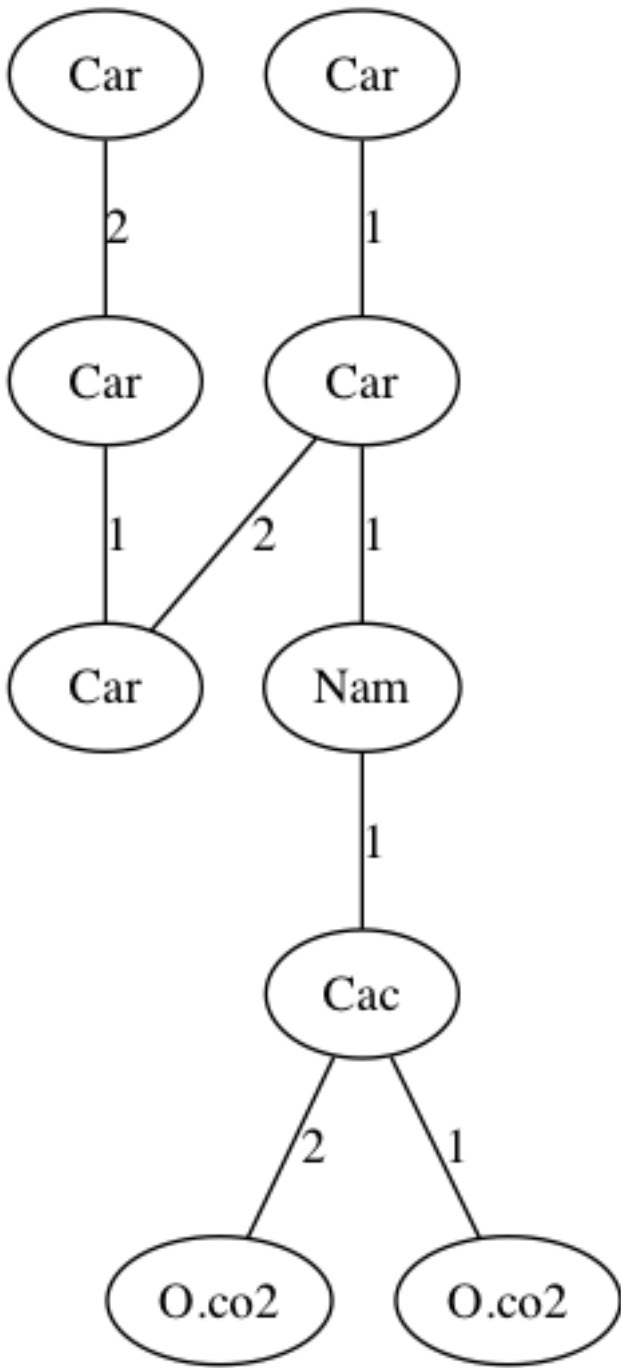

| Rank | Mann Whitney U Test p-value | Behavior Descriptor                                                                                |
|------|-----------------------------|----------------------------------------------------------------------------------------------------|
| 15   | 0.102053696                 | 2-Step height of piecewise linear fit of Force-Displacement Curve<br>(maximize, Linker in Tension) |

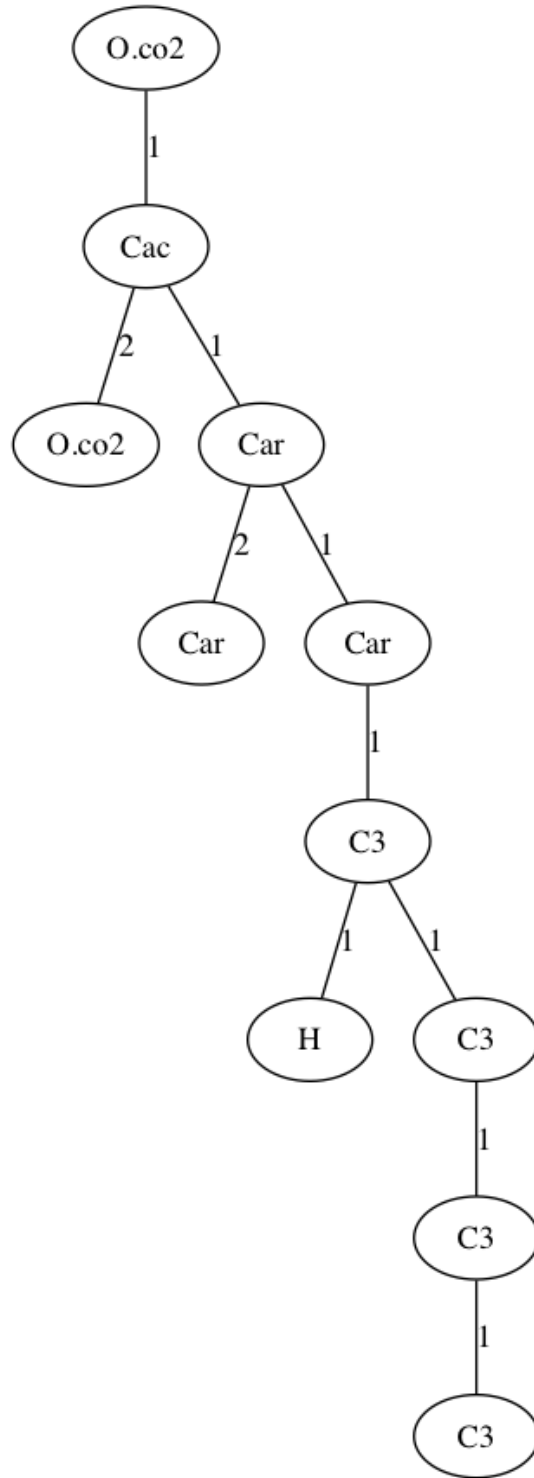



| Rank | Mann Whitney U Test p-value | Behavior Descriptor                                                                     |
|------|-----------------------------|-----------------------------------------------------------------------------------------|
| 16   | 0.103685468                 | 7-Nonlinearity in the stiffness around zero strain<br>(minimize, Linker in Compression) |

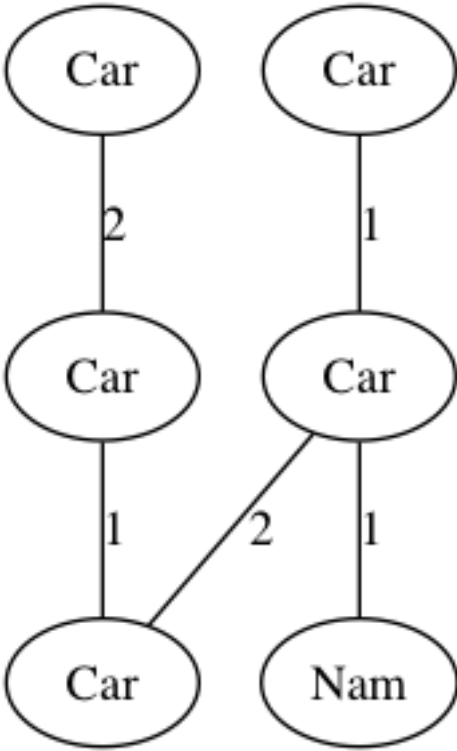

| Rank | Mann Whitney U Test p-value | Behavior Descriptor                                                                                |
|------|-----------------------------|----------------------------------------------------------------------------------------------------|
| 17   | 0.108701658                 | 2-Step height of piecewise linear fit of Force-Displacement Curve<br>(maximize, Linker in Tension) |

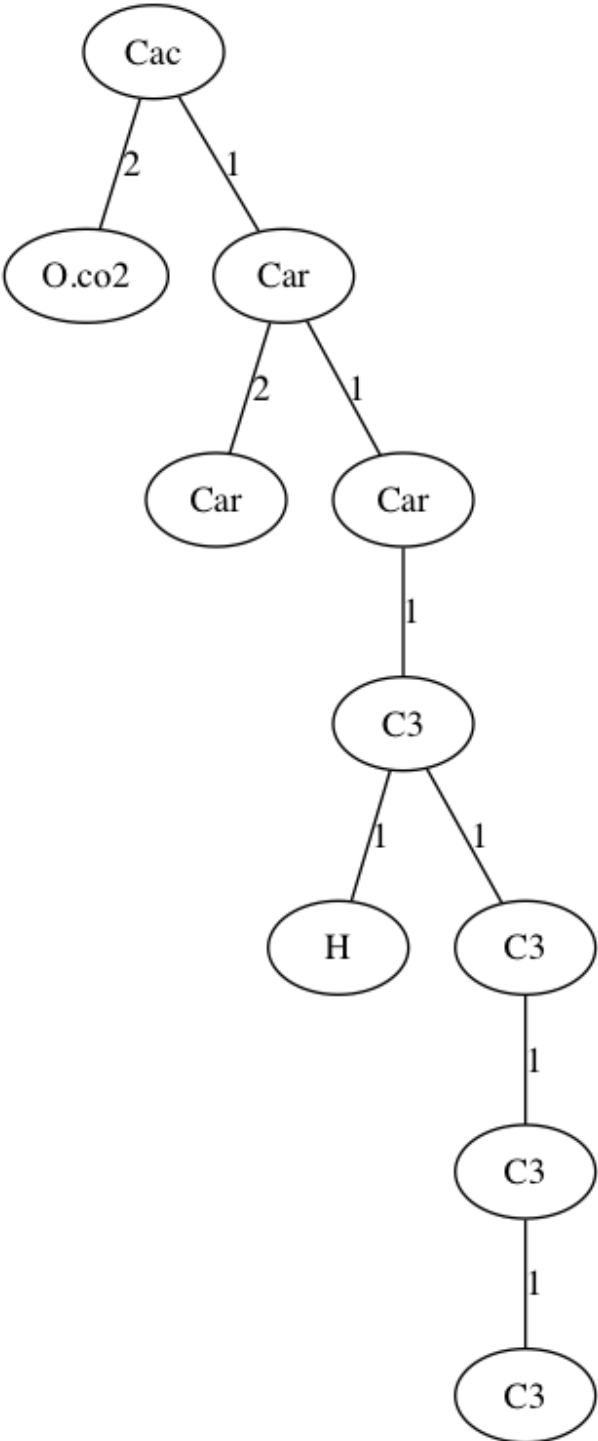

| Rank | Mann Whitney U Test p-value | Behavior Descriptor                                             |
|------|-----------------------------|-----------------------------------------------------------------|
| 18   | 0.116814129                 | 5-Stiffness after buckling<br>(minimize, Linker in Compression) |

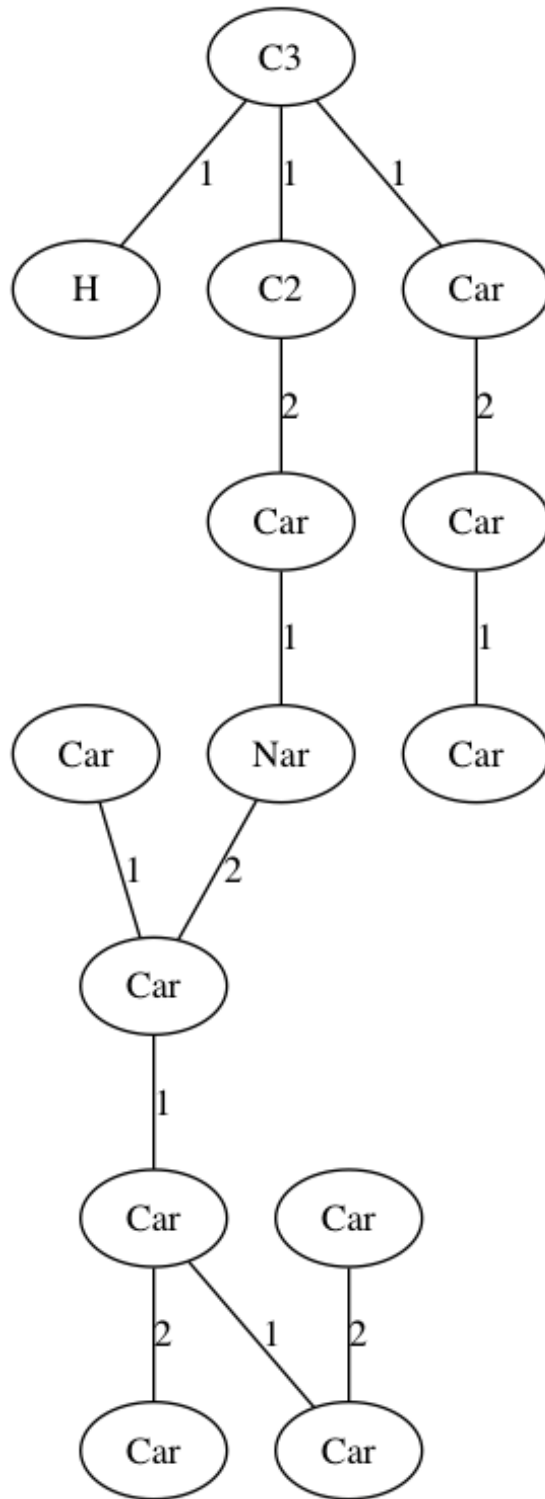

| Rank | Mann Whitney U Test p-value | Behavior Descriptor                                             |
|------|-----------------------------|-----------------------------------------------------------------|
| 19   | 0.118676296                 | 5-Stiffness after buckling<br>(minimize, Linker in Compression) |

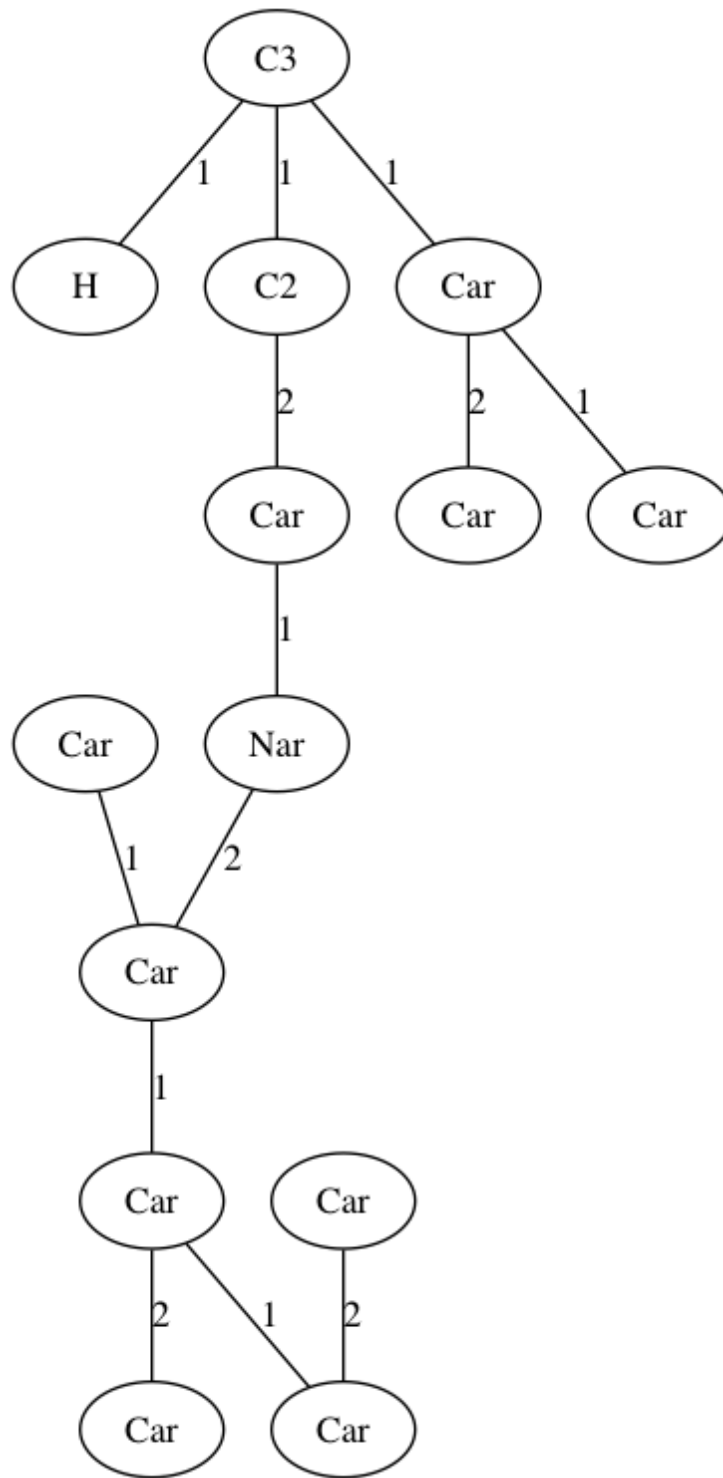

| Rank | Mann Whitney U Test p-value | Behavior Descriptor                                                                     |
|------|-----------------------------|-----------------------------------------------------------------------------------------|
| 20   | 0.122864292                 | 7-Nonlinearity in the stiffness around zero strain<br>(minimize, Linker in Compression) |

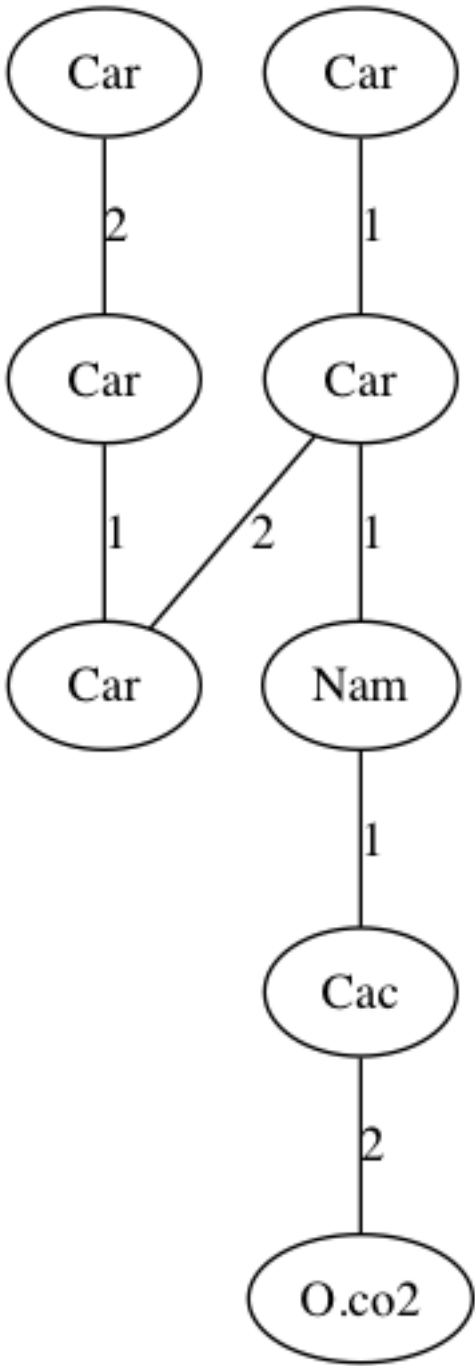

| Rank | Mann Whitney U Test p-value | Behavior Descriptor                                                                     |
|------|-----------------------------|-----------------------------------------------------------------------------------------|
| 21   | 0.122864292                 | 7-Nonlinearity in the stiffness around zero strain<br>(minimize, Linker in Compression) |

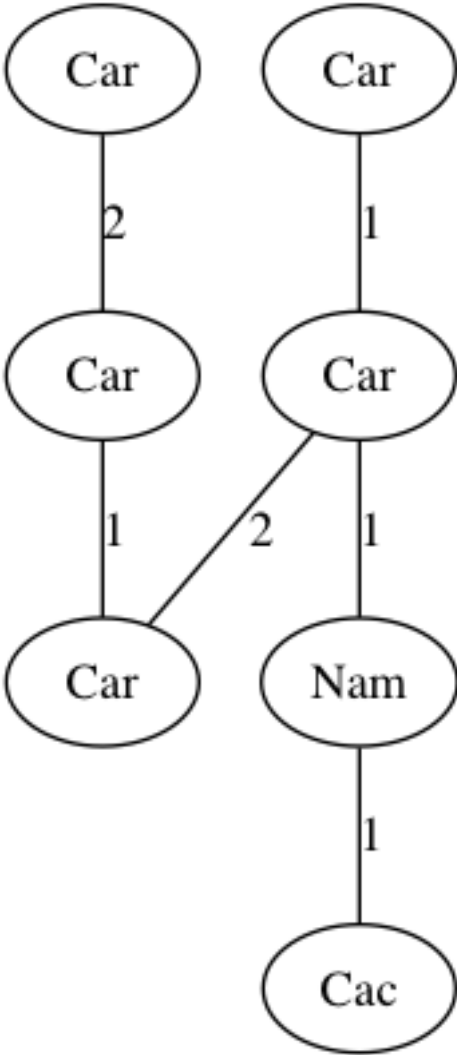

Supplement: c5dt03511b1.pdf [file c5dt03511b1.pdf]
